# Supplementary material for: A generalised background correction algorithm for a Halo Doppler lidar and its application to data from Finland
Source: Copernicus journal article supplement (doi:10.5194/amt-9-817-2016), 2016-03-03
Supplement: Supplementary file 1 [file amt-9-817-2016-supplement.zip]

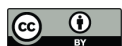

## *Supplement of*

# **A generalised background correction algorithm for a Halo Doppler lidar and its application to data from Finland**

**Antti J. Manninen et al.**

*Correspondence to:* Antti J. Manninen ([antti.j.manninen@helsinki.fi](mailto:antti.j.manninen@helsinki.fi))

- [amt-9-817-2016-supplement-title-page.pdf](#)
- [manninen\\_a\\_j\\_2015\\_Supplement](#)
  - [.DS\\_Store](#)
  - [correctBackground.m](#)
  - [example\\_data.mat](#)
  - [short\\_test\\_script.m](#)

The copyright of individual parts of the supplement might differ from the CC-BY 3.0 licence.
